# Supplementary material
Source: PubMed Central journal article supplement (PMC3832240)
Supplement: NIHMS486829-supplement-01.pdf [file NIHMS486829-supplement-01.pdf]

**Table S1. Number of deaths by primary cause and by category of dialysate bicarbonate**

| Primary cause of death        | All patients | Dialysate Bicarbonate (mEq/L) |          |         |
|-------------------------------|--------------|-------------------------------|----------|---------|
|                               |              | DB ≤ 32                       | DB 33-37 | DB ≥ 38 |
| Cardiovascular (CV)-related   | 1319         | 174                           | 838      | 307     |
| CV: Sudden death              | 584          | 70                            | 367      | 147     |
| CV: Non-Sudden death          | 735          | 104                           | 471      | 160     |
| Infection-related             | 502          | 65                            | 319      | 118     |
| Other (non-CV, non-infection) | 917          | 115                           | 613      | 189     |
| Cause unknown                 | 332          | 32                            | 216      | 84      |
| Missing data                  | 843          | 145                           | 501      | 197     |
| Total deaths                  | 3913         | 531                           | 2487     | 895     |
| Total patients                | 17031        | 2351                          | 10851    | 3829    |
